# Supplementary material for: Sequence variation between 462 human individuals fine-tunes functional sites of RNA processing
Source: Sci Rep. 2016 Sep 12;6:32406. doi: 10.1038/srep32406 (PMC5019111; doi:10.1038/srep32406)
Supplement: Supplementary Information [file srep32406-s1.pdf]

# Sequence variation between 462 human individuals fine-tunes functional sites of RNA processing

Pedro G. Ferreira, Martin Oti, Matthias Barann, Thomas Wieland, Suzana Ezquina, Marc R Friedländer, Manuel A Rivas, Anna Esteve-Codina, The Geuvadis Consortium, Philip Rosenstiel, Tim M Strom, Tuuli Lappalainen, Roderic Guigó, Michael Sammeth

## Supplementary Information

### [Supplementary Information](#)

#### [Supplementary Figures](#)

[Figure S1: Splice site variants and splicing scores](#)

[Figure S2: Evaluation of splice site scores](#)

[Figure S3: Characteristics of putative novel introns \(PNIs\)](#)

[Figure S4: Novel exon boundaries implied by putative novel introns \(PNIs\)](#)

[Figure S5: Attributes of introns and splice sites with RNA editing calls](#)

[Figure S6: Characteristics of putative cleavage sites \(PCSs\)](#)

[Figure S7: Layout of the study](#)

#### [Supplementary Tables](#)

[Table S1: RNA edited splice sites](#)

## Supplementary Figures

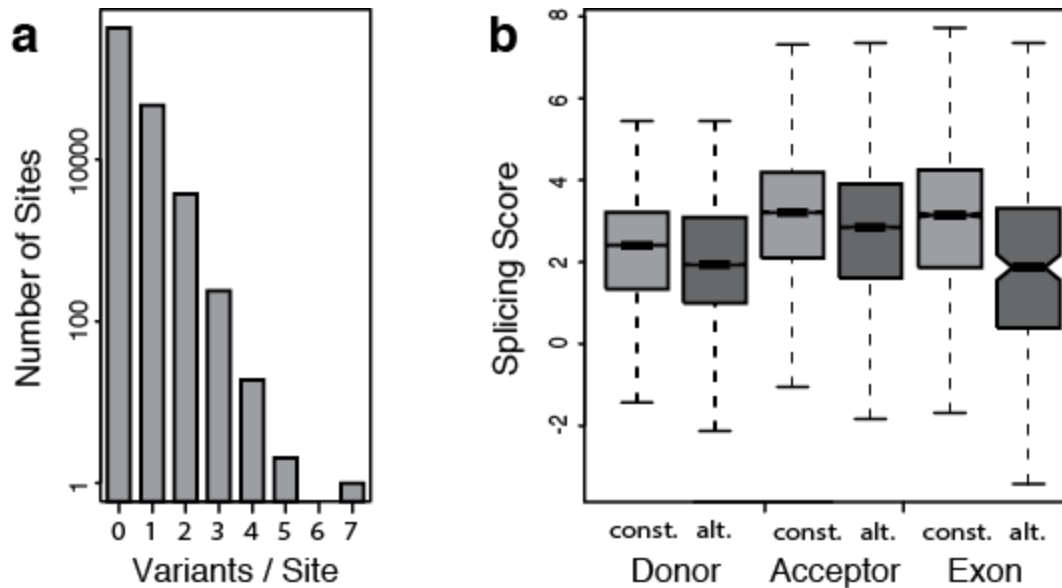

Figure S1: Splice site variants and splicing scores

(a) The number of splice sites that harbour multiple DNA polymorphisms decreases exponentially. (b) The distributions of HMM log-odd scores (splicing scores) computed for splice donor sites (green), splice acceptor sites (red) and exons (blue) confirm that constitutively spliced elements (light gray) exhibit generally higher scores than their alternatively spliced counterparts (dark gray). Splicing scores for exons have been computed by summing the splicing score calculated for each of their splice sites independently. Constitutive splice sites have been distinguished from alternative ones by the transcript annotations in the Gencode v12 reference, and exons with a PSI (percentage-spliced-in) value of  $>0.9$  in  $>90\%$  of the Geuvadis individuals have been considered constitutively spliced, otherwise they were classified as alternatively spliced exons.

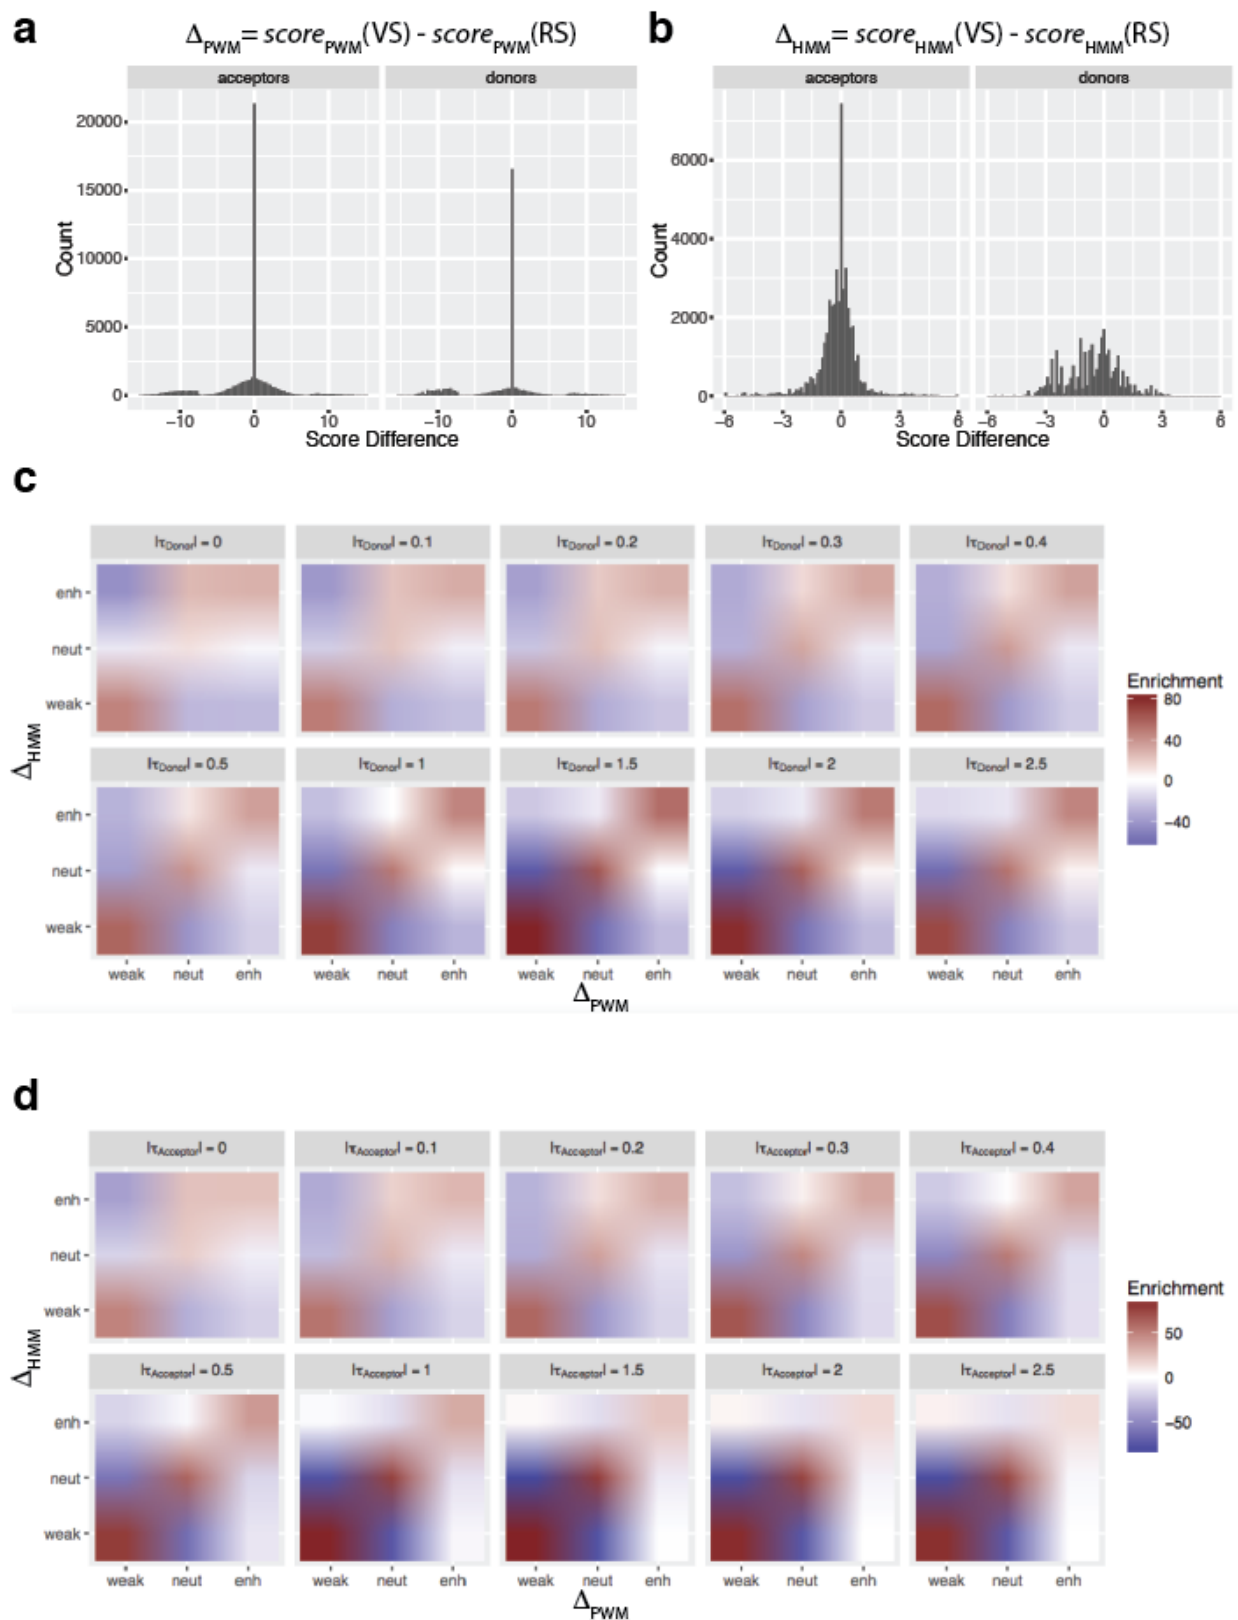

Figure S2: Evaluation of splice site scores

(a) The histogram shows the score differences  $\Delta_{\text{PWM}}$  obtained when subtracting the score for the reference splice site (RS) from the score of the variant splice site (VS), both computed based on PWMs. The distribution of  $\Delta$ -values shows three distinct classes, separating enhancing variants ( $\Delta_{\text{PWM}} > 6$ ) and weakening variants ( $\Delta_{\text{PWM}} < -6$ ) from neutral variants ( $-6 \leq \Delta_{\text{PWM}} \leq 6$ ). (b) In contrast, the histogram of the analogously computed  $\Delta_{\text{HMM}}$  score differences shows a more continuous distribution. Heatmap plots reveal the enrichment measured as standardized residuals of the chi-square test for (c) donor sites, and (d) acceptor sites when comparing PWM score categories (x-axis) to systematically evaluated categories based on HMM scores (y-axis). Variant effects have been classified according to different thresholds  $|\tau| = \{0.0, \dots, 2.5\}$  (shown at the top of each panel) on the  $\Delta_{\text{HMM}}$  values: all  $\Delta_{\text{HMM}} < -|\tau|$  are classified as weakening variants, all  $\Delta_{\text{HMM}} > |\tau|$  are classified as enhancing variants, and all remaining  $\Delta_{\text{HMM}}$  score changes are considered as neutral variants. Subsequently, the agreement between both scoring schemes was assessed by the enrichment of predictions from either method in the classification categories, scaling from negative (blue) to positive (red) scores. The systematic benchmark shows high enrichment in classifications that are mutually confirmed by PWM and HMM  $\Delta$ -values (i.e., in the weakening, in the neutral, and in the enhancing categories along the diagonal), especially at higher thresholds (i.e.,  $|\tau| \geq 1.5$  for donors, and  $|\tau| \geq 1.0$  for acceptors).

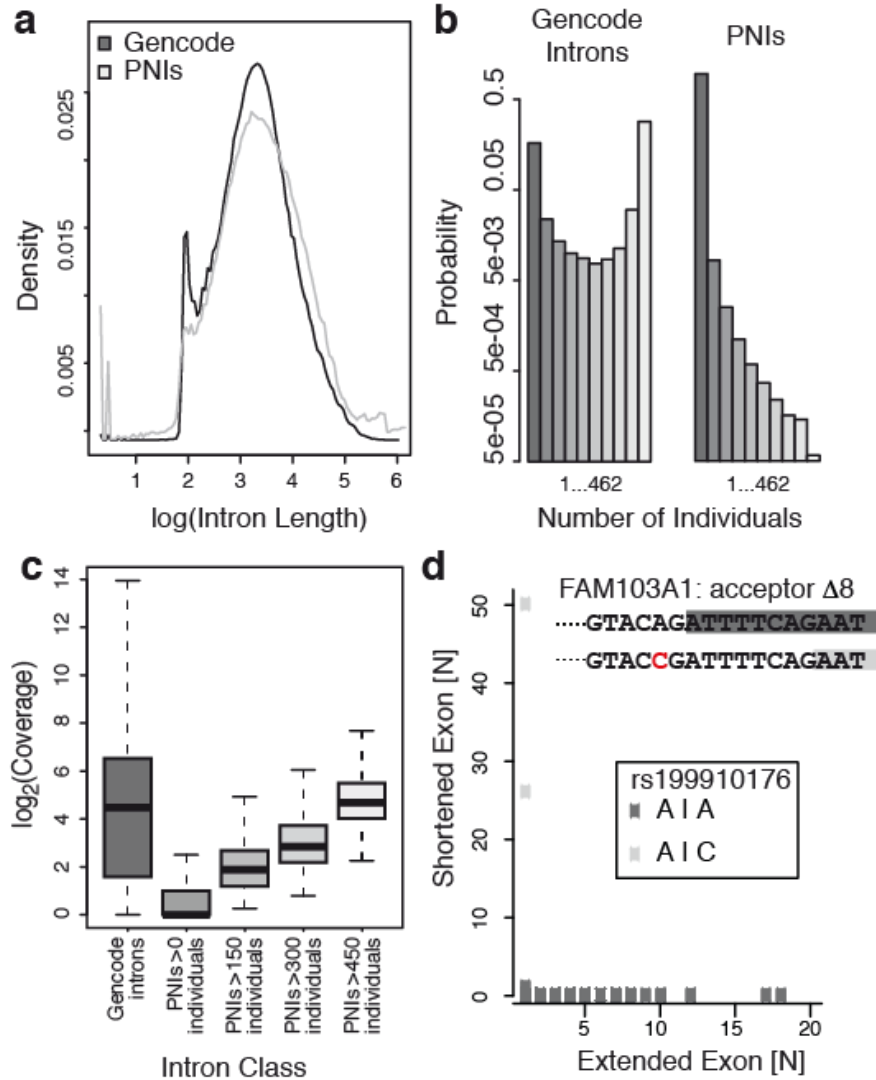

Figure S3: Characteristics of putative novel introns (PNIs)

(a) The length distribution of PNIs (grey curve) follows largely the histogram of intron sizes annotated in the Gencode reference transcriptome (black curve), with two main peaks for short introns (~100nt) and long introns (~1,600nt). PNIs exhibit additional outliers created by unusually short or long introns. (b) Introns annotated in the Gencode reference show a U-shaped distribution of population support, with many introns being supported by few or most individuals of the Geuvadis dataset. Whereas, most of the PNIs are minority events, observed only in a small proportion of individuals. (c) The split-mapped read coverage of PNIs correlates well with the population support, i.e., the number of individuals supporting the PNI. (d) The example shows a genetic polymorphism that creates alternative splicing at a novel cryptic splice site, by an A>C SNP disrupting the annotated upstream acceptor (chr15: 83,657,760) and enabling splicing at a latent downstream acceptor site 8nt downstream, which is not annotated in the Gencode reference (chr15: 83,657,768).

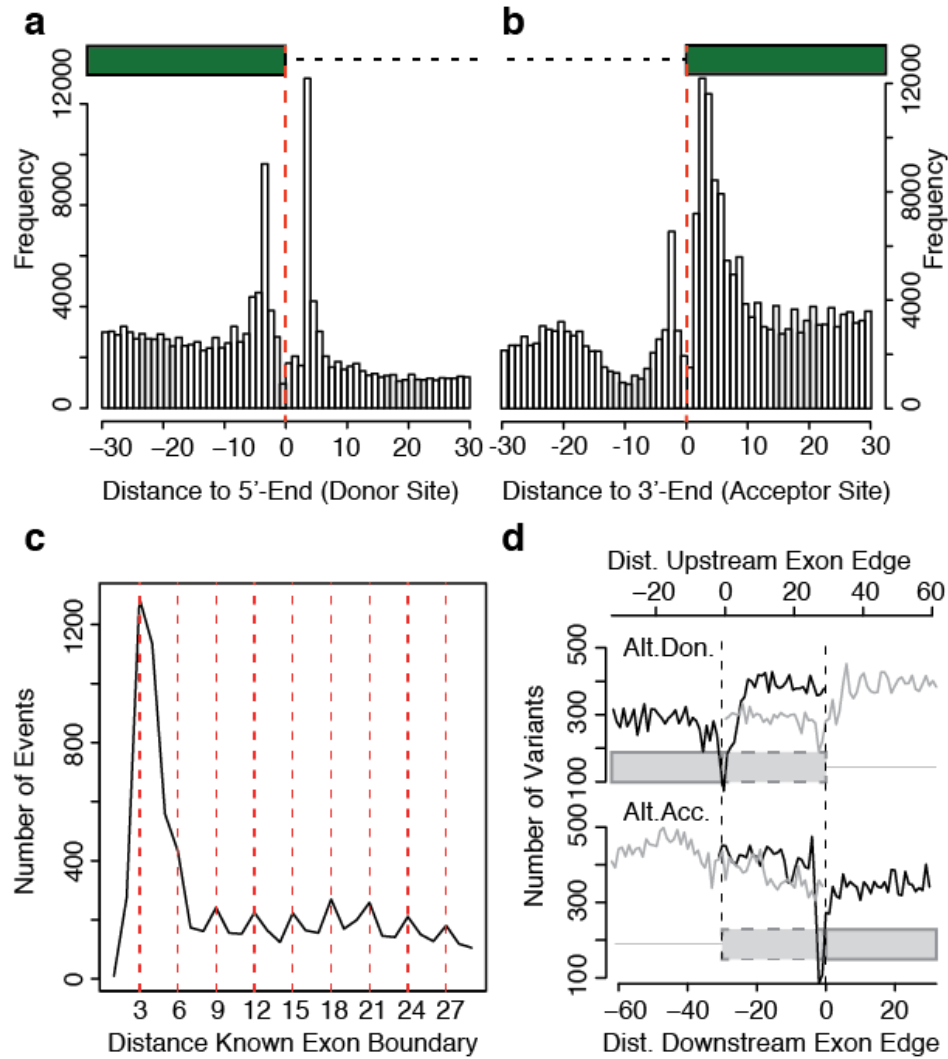

Figure S4: Novel exon boundaries implied by putative novel introns (PNIs)

Panel (a) and (b) show preferred locations of novel exon boundaries, as determined by the number of RNA-Seq mappings (y-axis), relative to the position of annotated exon boundaries (x-axis). These preferences confirm expectations based on characteristics intrinsic to the splice site motifs, at +4 for donor and at (-3) for acceptor sites. We also observe alternative splice site creation repressed in a region of about (-10) nt before the acceptor dinucleotide, which corresponds to the distance of a typical branch point, a region known to be depleted of adenine bases that could be confounded with the true branch site. (c) The distance of novel exon boundaries shows a periodicity of three (dashed red lines), implying influences by the coding sequence. (d) Novel exon boundaries that extend annotated exons (dashed box) also exhibit changes in the frequency of DNA polymorphisms (grey curve), similar to the one observed at annotated exon flanks (black curve).

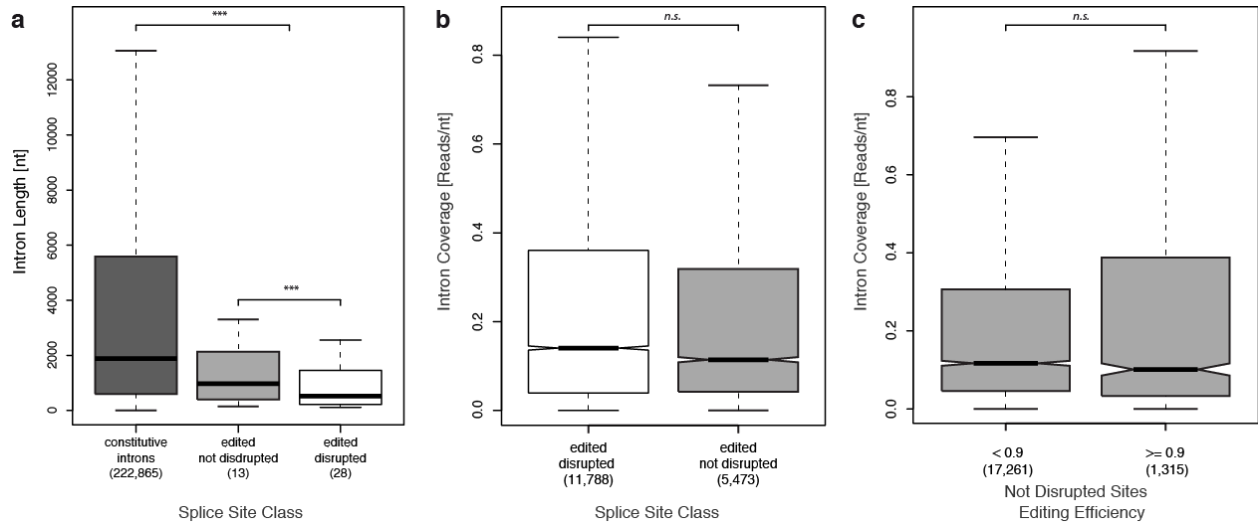

Figure S5: Attributes of introns and splice sites with RNA editing calls

(a) Constitutive introns with a median length of 1,881nt (dark gray box, mean= 7,246nt) are significantly longer than introns with predicted editing events in their splice site (constituted by the light gray and white distribution: median= 607nt, mean= 1,056nt, p-value  $\sim 8.8 \times 10^{-6}$ , MWW test). Also introns with edited but not disrupted sites (median= 972nt, mean= 1,554nt) are still longer than introns with splice sites that are predicted to be disrupted by RNA editing (median= 522.5nt, mean= 842.9nt; p-value  $\sim 1.1 \times 10^{-9}$ , MWW test). The number in parentheses below each class of introns shows the number of introns analyzed. (b) The intron coverage (y-axis) is only marginally higher in introns with splice sites that are presumptively disrupted by RNA editing than in introns with splice sites that are affected but not disrupted by editing events (median 0.14 vs. 0.11 reads/nt, p-value  $\sim 0.058$ , MWW test). (c) Also the read coverage levels of introns that are lowly and highly edited do not differ significantly from each other (median 0.12 vs. 0.10 reads/nt, p-value  $\sim 0.052$ , MWW test).

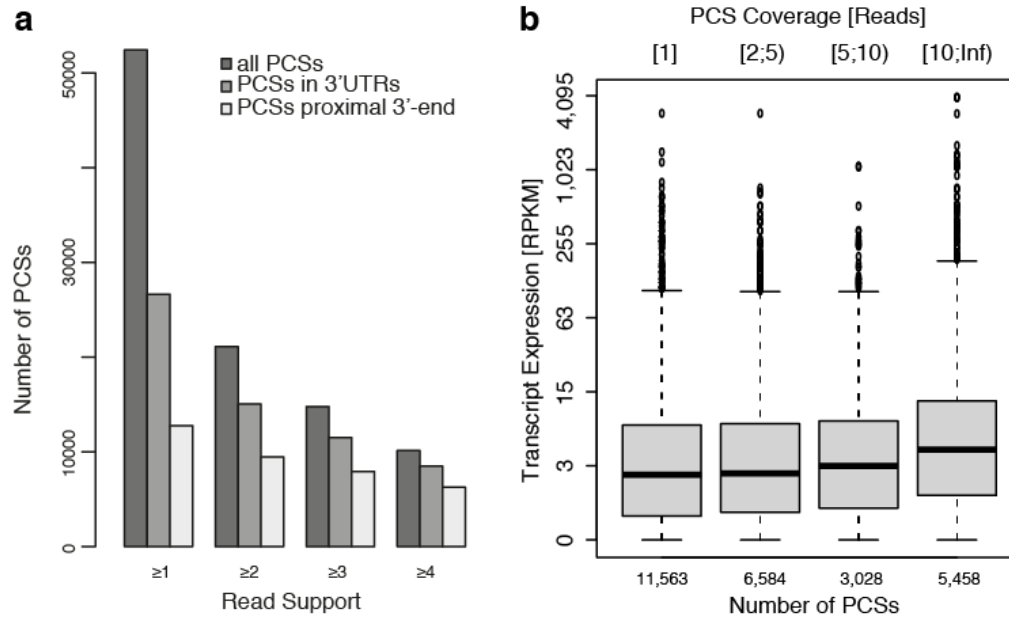

Figure S6: Characteristics of putative cleavage sites (PCSs)

(a) PCSs that are confirmed exclusively by one read are often predicted outside of annotated 3' UTRs (dark grey bar). In contrast, more conservative PCS predictions with  $>1$  supporting read (x-categories) locate relatively more often in 3' UTRs (medium grey bars) or within 50nt proximity of annotated cleavage sites (light grey bar). (b) Expression levels (i.e., distributions of RPKM values, y-axis) in the genes overlapping PCSs are rather constant when considering PCSs with different read support levels (x-categories), showing that the PCS coverage is determined by polyadenylation efficiency rather than by expression.

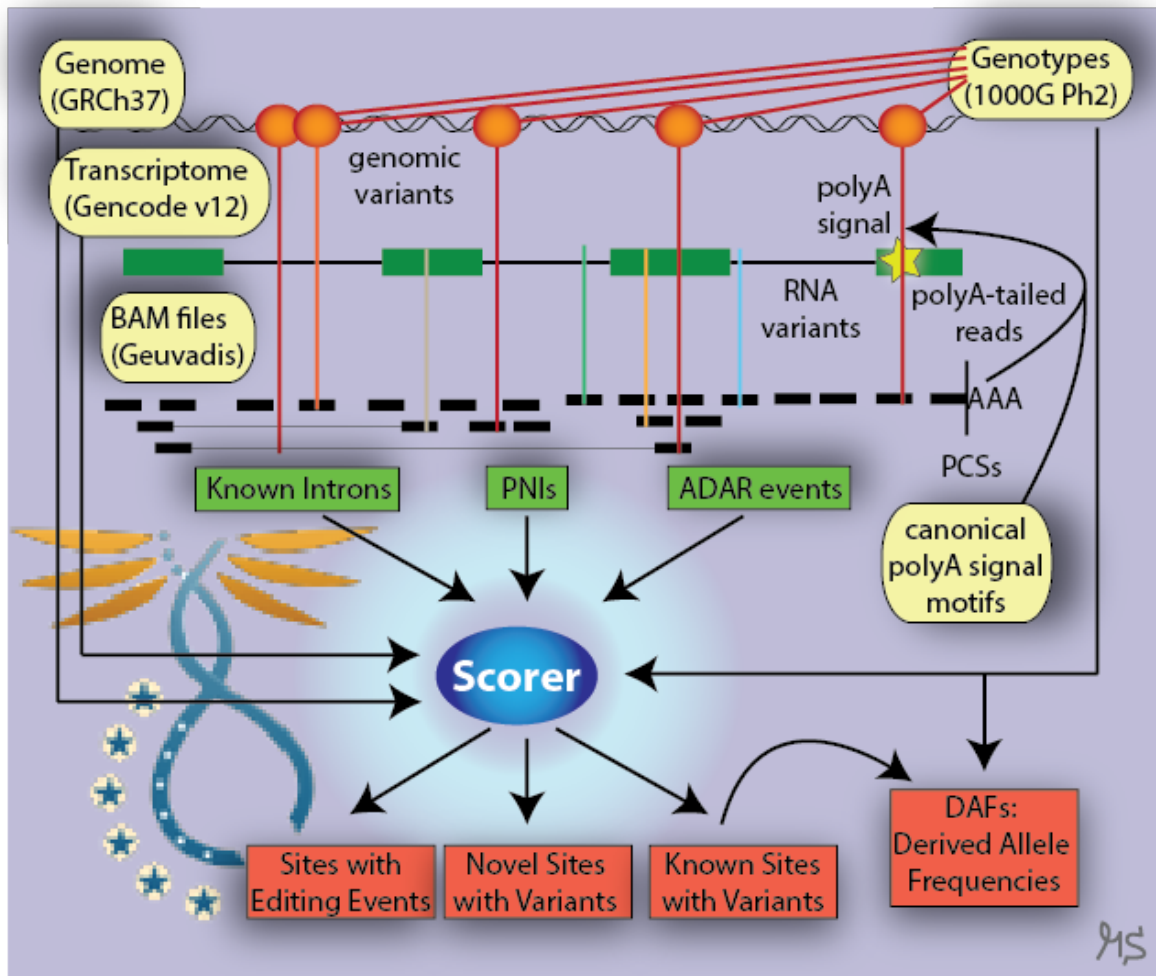

Figure S7: Layout of the study

**Yellow boxes:** For our study, we employed the human genome assembly GRCh37, the Gencode v12 transcriptome annotation, 13 hexamer sequences described in literature as the most abundant polyA signals in human, genotypes annotated by Phase 2 of the 1000 Genomes Project (<http://www.ebi.ac.uk/arrayexpress/experiments/E-GEUV-1/files/genotypes/>) and the Geuvadis RNA-Seq reads from quality controlled individuals and their corresponding mapping locations in the genome (<http://www.ebi.ac.uk/arrayexpress/files/E-GEUV-1/processed/>). **Green boxes:** From these read mappings, we collected all expressed introns known in the Gencode annotation and we rescued putative novel introns (PNIs) as well as putative cleavage sites (PCSs), following the corresponding protocols described in our Methods section. Furthermore, we called putative RNA editing events from mapped reads by polymorphisms that are not of genomic origin and that describe A-to-G transitions as caused by the ADAR pathway. The effects of sequence variation in polyadenylation signals has been analyzed by evaluating the altered polyA signals according to the reference polyA signal sequences. **Red boxes:** Variants in splice sites were evaluated by the Scorer tool we developed, which we used to predict the effect

of DNA and RNA polymorphisms in known as well as in novel splice sites. Employing allele frequencies determined by the 1000 Genomes Project for each variant, we additionally estimated derived allele frequencies (DAFs) for the variants of different categories.

## Supplementary Tables

Table S1: RNA edited splice sites

The table characterizes 41 different splice sites influenced by ADAR editing events. The predicted effect (column “Fx”) of each RNA modification (columns “Chr” and “Pos”) is categorized according to the splice score into disrupting (DR), weakening (WK), neutral (NT), enhancing (EH) and activating (AV) RNA editing events. The “Site” column shows the modified splice site sequence, with the putatively edited base highlighted by a capital “G” letter, the splice site dinucleotide marked in red, and the adjacent exon boundary represented by the symbol “|” in the sequence. The column “AS” (i.e., alternative splicing) shows whether the Gencode reference annotates no alternative splicing at all (“NA”), intron retention (“IR”), and respectively alternative donor or alternative acceptor sites (“AD” / “AA”) in the representative intron. In the case of the GSTK1 gene, the retained intron maintains the annotated reading frame (marked by an asterisk). Note that most of the genes with predicted RNA editing events are essential and related to ribosomal functions, RNA processing or splicing, and located in intracellular organelles.

| <b>Gene</b> | <b>Transcript ID</b>     | <b>C<br/>hr</b> | <b>Pos</b>  | <b>Site</b>                                  | <b>Fx</b> | <b>Intron<br/>start</b> | <b>Intron<br/>end</b> | <b>AS</b> |
|-------------|--------------------------|-----------------|-------------|----------------------------------------------|-----------|-------------------------|-----------------------|-----------|
| ENO1        | OTTHUMT00000<br>004945.1 | 1               | 8,930,571   | aatttgatttgattgttcct<br>tcc <b>Gg</b>  gtgtc | DR        | 8,930,569               | 8,931,950             | AA        |
| RPL11       | OTTHUMT00000<br>008168.1 | 1               | 24,021,288  | tgtg  <b>gt</b> atga <b>Gta</b>              | NT        | 24,021,281              | 24,022,288            | AD        |
| MCL1        | OTTHUMT00000<br>084402.1 | 1               | 150,549,969 | tgtgcttttctttttgttt<br>tct <b>Gg</b>  gatgg  | DR        | 150,549,967             | 150,550,720           | NA        |
| RASGRP<br>3 | OTTHUMT00000<br>325341.1 | 2               | 33,741,712  | gcat  <b>Gt</b> atctttt                      | AV        | 33,741,711              | 33,745,019            | AD        |
| SP140L      | OTTHUMT00000<br>374538.1 | 2               | 231,264,957 | aga <b>G</b>   <b>gt</b> aagtgac             | EH        | 231,264,957             | 231,265,670           | IR        |
| QARS        | OTTHUMT00000<br>345693.1 | 3               | 49,140,844  | cagctccttgctgctatgct<br>tct <b>Gg</b>  gagag | DR        | 49,140,842              | 49,141,064            | IR        |

|        |                          |    |             |                                     |    |             |             |     |
|--------|--------------------------|----|-------------|-------------------------------------|----|-------------|-------------|-----|
| TKT    | OTTHUMT00000<br>350356.1 | 3  | 53,265,568  | ctgtcctccccgtgttggtc<br>tgcGg gggta | DR | 53,265,566  | 53,267,172  | IR  |
| RFS23  | OTTHUMT00000<br>370358.1 | 5  | 81,573,673  | aagaactaaaatatttaatt<br>tttGg gcaag | DR | 81,573,671  | 81,574,139  | AA  |
| ERAP1  | ENST00000<br>414384.2    | 5  | 96,110,490  | gaatTTTTatGcttatttgt<br>tgtag tgaat | NT | 96,110,475  | 96,111,938  | IR  |
| CD74   | OTTHUMT00000<br>374177.1 | 5  | 149,785,886 | aaccttctgttacttcctcc<br>cacGg cccat | DR | 149,785,884 | 149,786,444 | NA  |
| CD74   | OTTHUMT00000<br>374177.1 | 5  | 149,786,525 | cttaccctcgttctgtccc<br>cacGg ctccc  | DR | 149,786,523 | 149,786,715 | IR  |
| MAT2B  | OTTHUMT00000<br>374193.1 | 5  | 162,943,522 | attatttgcTTTTattcttc<br>tctGg gagct | DR | 162,941,000 | 162,943,524 | NA  |
| DDX39B | OTTHUMT00000<br>259083.1 | 6  | 31,498,705  | agtgcctaccctctgtctcc<br>tccGg gtggc | DR | 31,498,703  | 31,498,830  | AA  |
| TAP1   | OTTHUMT00000<br>076087.2 | 6  | 32,814,841  | acag gtGggcgag                      | WK | 32,813,562  | 32,814,845  | NA  |
| SFT2D1 | OTTHUMT00000<br>043062.2 | 6  | 166,738,085 | attgctctgttttgcgtgt<br>gttGg tggca  | DR | 166,738,083 | 166,739,620 | AA  |
| GSTK1  | OTTHUMT00000<br>327143.1 | 7  | 142,962,352 | tcctgctgtcttctcttctt<br>cccGg aatga | DR | 142,962,185 | 142,962,354 | IR* |
| STOML2 | OTTHUMT00000<br>052273.1 | 9  | 35,101,559  | gtggggcttacaccttttt<br>tccGg gaacg  | DR | 35,101,557  | 35,101,707  | NA  |
| TXN    | OTTHUMT00000<br>053614.1 | 9  | 113,013,097 | tcag gtGttagc                       | WK | 113,007,123 | 113,013,100 | AA  |
| P4HA1  | OTTHUMT00000<br>048602.1 | 10 | 74,774,049  | gaatttactgtgttttatt<br>cacGg aaaga  | DR | 74,774,047  | 74,776,604  | NA  |
| FUT11  | OTTHUMT00000<br>048692.1 | 10 | 75,538,589  | gcttacctgtttgaccttt<br>tgcag aaaGg  | EH | 75,535,916  | 75,538,586  | AA  |
| RPS13  | OTTHUMT00000<br>387320.2 | 11 | 17,099,026  | cgagactgcttctctccccG<br>ggaag ggcct | EH | 17,099,024  | 17,099,166  | IR  |
| RPS13  | OTTHUMT00000<br>387321.1 | 11 | 17,099,026  | acctcgagactgcttctctc<br>cccGg gaagg | DR | 17,099,020  | 17,099,166  | IR  |
| PTPN6  | OTTHUMT00000<br>400019.1 | 12 | 7,066,815   | tccccaccgacctccctt<br>tccGg aacia   | DR | 7,065,731   | 7,066,817   | NA  |
| PFDN5  | OTTHUMT00000<br>405372.1 | 12 | 53,690,026  | gtgtttgtcttcattgttt<br>cacGg ggaaa  | DR | 53,689,725  | 53,690,028  | IR  |
| PCBP2  | OTTHUMT00000<br>407073.1 | 12 | 53,862,559  | ttgcttgcctctcttctgtc<br>tttGg caggt | DR | 53,861,627  | 53,862,561  | IR  |
| PCBP2  | OTTHUMT00000<br>407545.1 | 12 | 53,862,559  | cttgctctcttctgtctttt<br>Ggcag gtttg | EH | 53,861,627  | 53,862,564  | IR  |
| ATP5B  | OTTHUMT00000<br>408380.1 | 12 | 57,038,952  | ttgg gtGagtaga                      | NT | 57,038,739  | 57,038,955  | NA  |

|                  |                          |    |            |                                     |    |            |            |    |
|------------------|--------------------------|----|------------|-------------------------------------|----|------------|------------|----|
| MDM2             | OTTHUMT00000<br>402676.1 | 12 | 69,237,519 | tgtctgtctcaataaatggc<br>caaGg ggatt | DR | 69,237,044 | 69,237,521 | IR |
| PABPN1           | OTTHUMT00000<br>071766.4 | 14 | 23,792,278 | caat gtGcgctact                     | WK | 23,792,275 | 23,792,586 | IR |
| B2M              | OTTHUMT00000<br>415957.1 | 15 | 45,008,525 | ttttctccactgtcttttt<br>catGg atcga  | DR | 45,007,899 | 45,008,527 | AA |
| FUS              | OTTHUMT00000<br>433552.1 | 16 | 31,198,121 | ctttcttctaactgtcttc<br>tccGg cggaa  | DR | 31,196,500 | 31,198,123 | IR |
| GOT2             | OTTHUMT00000<br>258289.3 | 16 | 58,750,564 | tatg gtGagctac                      | NT | 58,750,083 | 58,750,567 | NA |
| EIF-4A1          | OTTHUMT00000<br>226952.6 | 17 | 7,480,372  | tattggcttttttttcttc<br>tctGg cccc   | DR | 7,480,010  | 7,480,374  | IR |
| C17orf76-<br>AS1 | OTTHUMT00000<br>130473.1 | 17 | 16,342,840 | actgtcctgatgatactgt<br>aatGg gaagt  | DR | 16,342,728 | 16,342,842 | IR |
| DDX5             | OTTHUMT00000<br>444030.1 | 17 | 62,498,343 | taacacaacttgtcttttaa<br>cttGg gtggc | DR | 62,498,341 | 62,498,557 | IR |
| SEPT9            | OTTHUMT00000<br>436345.1 | 17 | 75,488,701 | ccatctctctccctccttat<br>cccGg atcac | DR | 75,486,941 | 75,488,703 | NA |
| EIF3K            | OTTHUMT00000<br>453406.1 | 19 | 39,125,631 | cccttgctgccctgtcacc<br>tgcGg acagc  | DR | 39,123,318 | 39,125,633 | NA |
| RPS19            | OTTHUMT00000<br>463049.1 | 19 | 42,373,767 | ctgcatgacccttcctccc<br>cacGg cggcc  | DR | 42,373,284 | 42,373,769 | NA |
| BAX              | OTTHUMT00000<br>463049.1 | 19 | 42,373,826 | acag gtGaggcct                      | NT | 42,373,823 | 42,375,419 | NA |
| BAX              | OTTHUMT00000<br>360763.1 | 19 | 49,458,803 | cctcttcccttcctttctcc<br>tctGg ggccc | DR | 49,458,219 | 49,458,805 | IR |
| RPL13A           | OTTHUMT00000<br>258989.1 | 19 | 49,993,487 | ctgctaagcctttccctccc<br>tctGg gccgg | DR | 49,993,179 | 49,993,489 | IR |
